# Supplementary material
Source: PubMed Central journal article supplement (PMC4160279)
Supplement: ja505272n_si_001.pdf [file ja505272n_si_001.pdf]

## SUPPORTING INFORMATION FOR:

### Gangliosides are Ligands for Human Noroviruses

Ling Han, Ming Tan, Ming Xia, Elena N. Kitova, Xi Jiang and John S. Klassen

**Table S1.** Intrinsic association constants ( $K_{a,int}$ ) for the NoV VA387 P dimer and the histo-blood group type 3 oligosaccharides (H3, A3 and B3) in an aqueous ammonium acetate solution (200 mM) at pH 7 and 25 °C measured using the direct ESI-MS assay performed in negative ion mode.<sup>a</sup>

| Ligand | $K_{a,int}$ ( $M^{-1}$ ) | $K_{a,int}$ ( $M^{-1}$ ) <sup>b</sup> |
|--------|--------------------------|---------------------------------------|
| H3     | $720 \pm 80$             | $650 \pm 65$                          |
| A3     | $760 \pm 60$             | $800 \pm 50$                          |
| B3     | $1500 \pm 230$           | $1500 \pm 150$                        |

a. The reported errors are one standard deviation. b. Values taken from reference S1.

**Table S2.** Summary of results from screening of ganglioside oligosaccharide against the P particle of human NoV VA387 in an aqueous ammonium acetate solution (200 mM) at pH 7 and 25 °C using the CaR-ESI-MS assay.

| Oligosaccharide | Binder (+) / Non-binder (-) |
|-----------------|-----------------------------|
| GM3             | +                           |
| GM2             | +                           |
| GM1a            | +                           |
| GM1b            | +                           |
| GD3             | +                           |
| GD2             | +                           |
| GD1a            | -                           |
| GD1b            | -                           |
| GT3             | -                           |
| GT2             | -                           |
| GT1a            | -                           |
| GT1c            | -                           |
| fucosyl-GM1     | +                           |
| asialo-GM1      | -                           |
| asialo-GM2      | -                           |

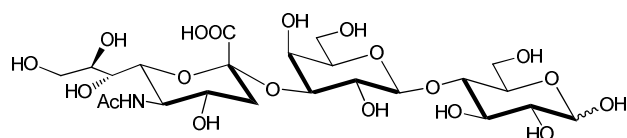

**GM3**

MW 633.21 Da

$\alpha$ -D-Neu5Ac-(2,3)- $\beta$ -D-Gal-(1,4)-D-Glc

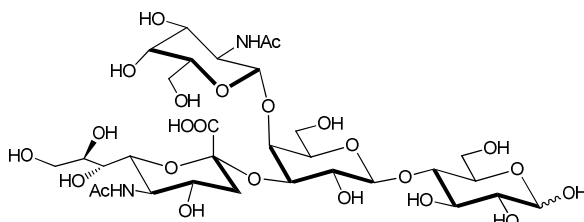

**GM2**

MW 836.29 Da

$\beta$ -D-GalNAc-(1,4)-[ $\alpha$ -D-Neu5Ac-(2,3)]- $\beta$ -D-Gal-(1,4)-D-Glc

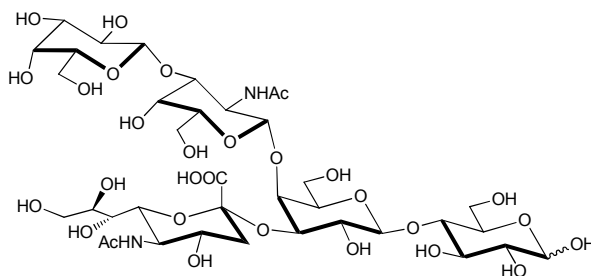

**GM1a**

MW 998.34 Da

$\beta$ -D-Gal-(1,3)- $\beta$ -D-GalNAc-(1,4)-[ $\alpha$ -D-Neu5Ac-(2,3)]- $\beta$ -D-Gal-(1,4)-D-Glc

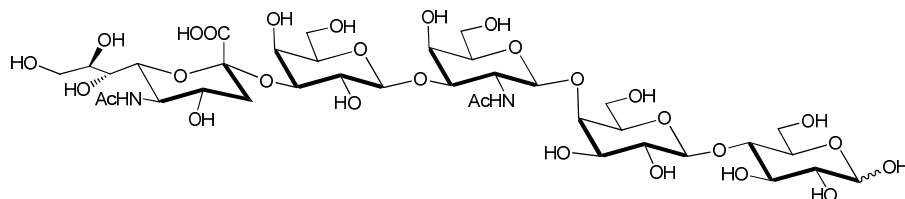

**GM1b**

MW 998.34 Da

$\alpha$ -D-Neu5Ac-(2,3)- $\beta$ -D-Gal-(1,3)- $\beta$ -D-GalNAc-(1,4)- $\beta$ -D-Gal-(1,4)-D-Glc

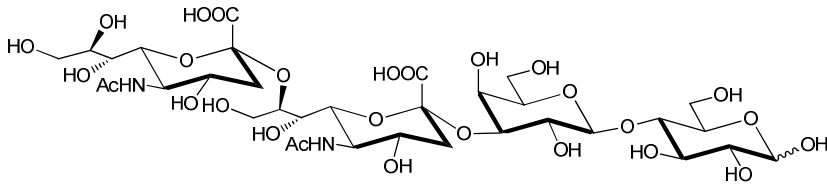

**GD3**

MW 924.31 Da

$\alpha$ -D-Neu5Ac-(2,8)- $\alpha$ -D-Neu5Ac-(2,3)- $\beta$ -D-Gal-(1,4)-D-Glc

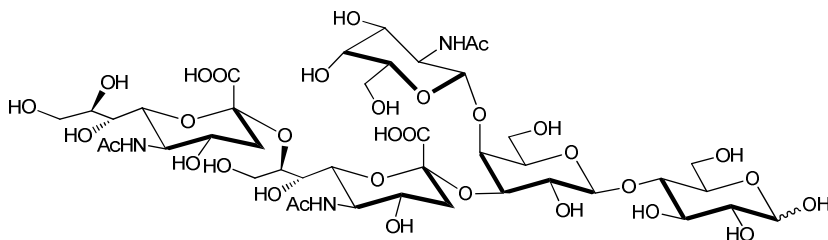

**GD2**

MW 1127.39 Da

$\beta$ -D-GalNAc-(1,4)-[ $\alpha$ -D-Neu5Ac-(2,8)- $\alpha$ -D-Neu5Ac-(2,3)]- $\beta$ -D-Gal-(1,4)-D-Glc

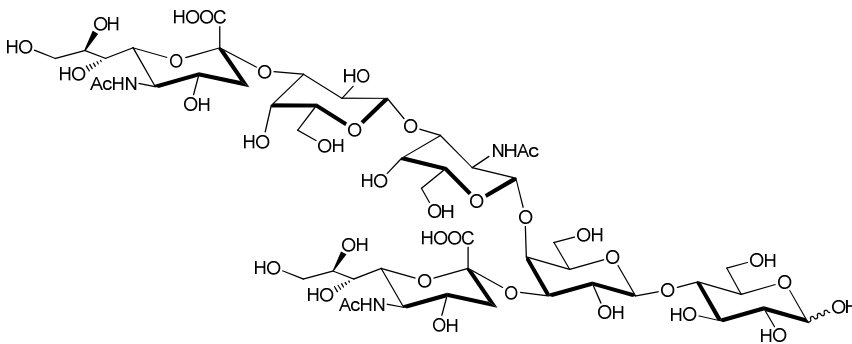

**GD1a**

MW 1289.44 Da

$\alpha$ -D-Neu5Ac-(2,3)- $\beta$ -D-Gal-(1,3)- $\beta$ -D-GalNAc-(1,4)-[ $\alpha$ -D-Neu5Ac-(2,3)]- $\beta$ -D-Gal-(1,4)-D-Glc

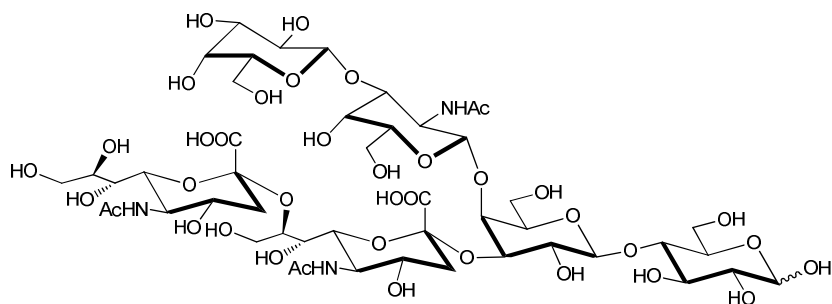

**GD1b**

MW 1289.44 Da

$\beta$ -D-Gal-(1,3)- $\beta$ -D-GalNAc-(1,4)-[ $\alpha$ -D-Neu5Ac-(2,8)- $\alpha$ -D-Neu5Ac-(2,3)]- $\beta$ -D-Gal-(1,4)-D-Glc

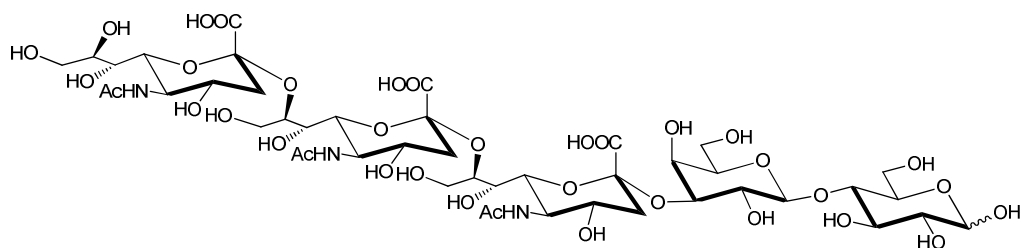

**GT3**

MW 1215.40 Da

$\alpha$ -D-Neu5Ac-(2,8)- $\alpha$ -D-Neu5Ac-(2,8)- $\alpha$ -D-Neu5Ac-(2,3)- $\beta$ -D-Gal-(1,4)-D-Glc

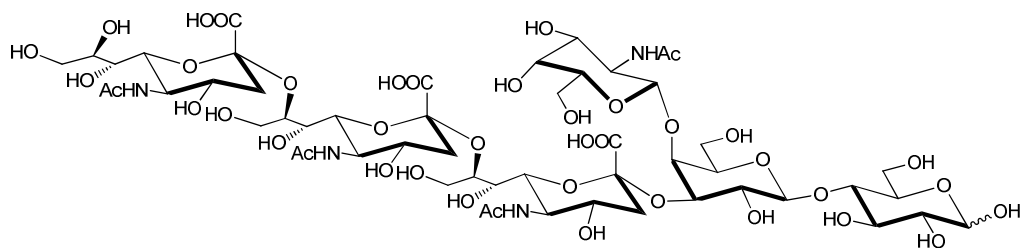

**GT2**

MW 1418.48 Da

$\beta$ -D-GalNAc-(1,4)-[ $\alpha$ -D-Neu5Ac-(2,8)- $\alpha$ -D-Neu5Ac-(2,8)- $\alpha$ -D-Neu5Ac-(2,3)]- $\beta$ -D-Gal-(1,4)-D-Glc

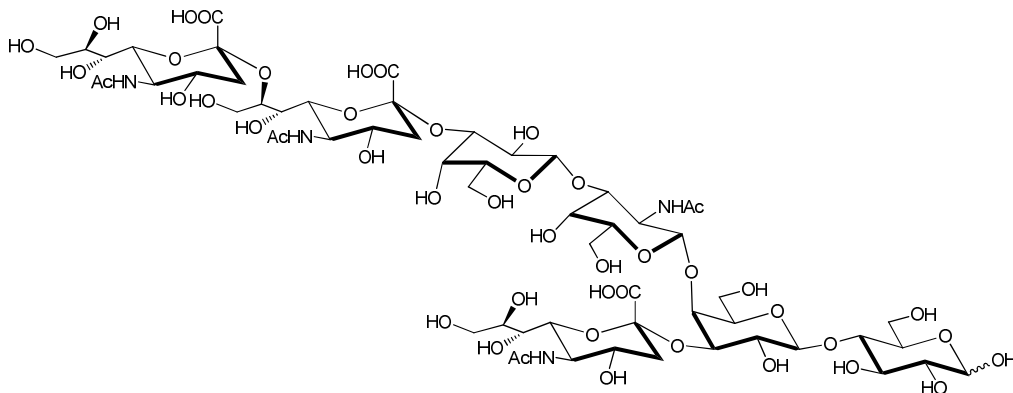

**GT1a**

MW 1580.53 Da

$\alpha$ -D-Neu5Ac-(2,8)- $\alpha$ -D-Neu5Ac-(2,3)- $\beta$ -D-Gal-(1,3)- $\beta$ -D-GalNAc-(1,4)-  
[ $\alpha$ -D-Neu5Ac-(2,3)]- $\beta$ -D-Gal-(1,4)-D-Glc

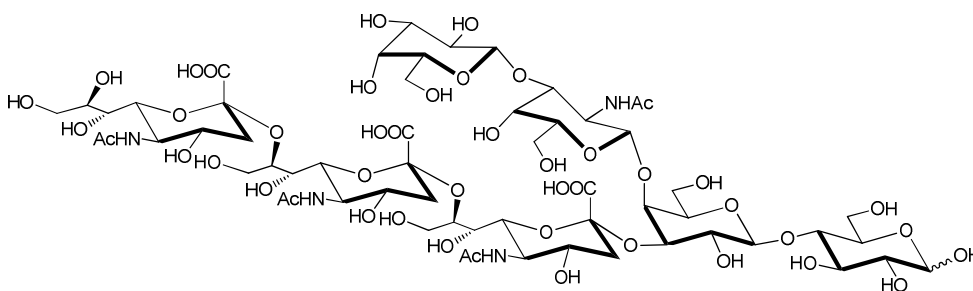

**GT1c**

MW 1580.53 Da

$\beta$ -D-Gal-(1,3)- $\beta$ -D-GalNAc-(1,4)-[ $\alpha$ -D-Neu5Ac-(2,8)- $\alpha$ -D-Neu5Ac-(2,8)-  
 $\alpha$ -D-Neu5Ac-(2,3)]- $\beta$ -D-Gal-(1,4)-D-Glc

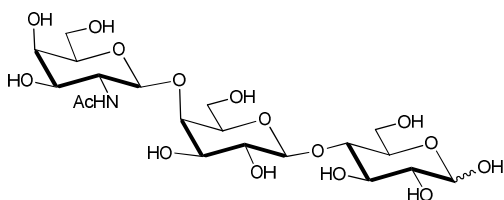

**asialo-GM2**

MW 545.20 Da

$\beta$ -D-GalNAc-(1,4)- $\beta$ -D-Gal-(1,4)-D-Glc

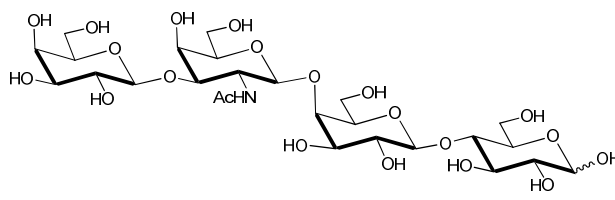

**asialo-GM1**

MW 707.25 Da

$\beta$ -D-Gal-(1,3)- $\beta$ -D-GalNAc-(1,4)- $\beta$ -D-Gal-(1,4)-D-Glc

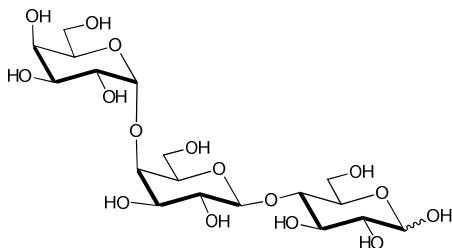

**Gb3**

MW 545.20 Da

$\alpha$ -D-Gal-(1,4)- $\beta$ -D-Gal-(1,4)-D-Glc

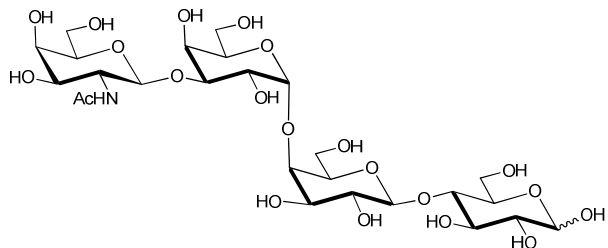

**Gb4**

MW 707.25 Da

$\beta$ -D-GalNAc-(1,3)- $\alpha$ -D-Gal-(1,4)- $\beta$ -D-Gal-(1,4)-D-Glc

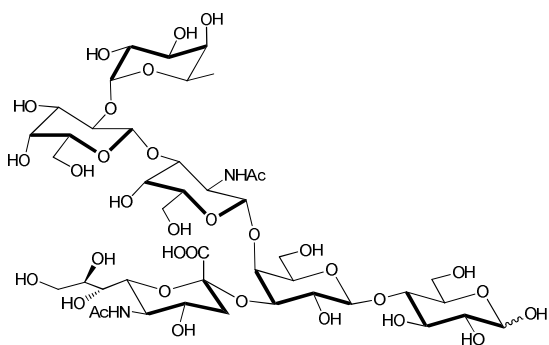

**fucosyl-GM1 (Fuc-GM1)**

MW 1144.40 Da

$\alpha$ -L-Fuc-(1,2)- $\beta$ -D-Gal-(1,3)- $\beta$ -D-GalNAc-(1,4)-[ $\alpha$ -D-Neu5Ac-(2,3)]- $\beta$ -D-Gal-(1,4)-D-Glc

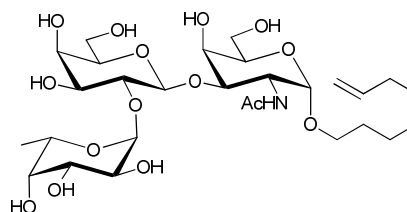

**H type 3 trisaccharide (H3)**

MW 639.31 Da

$\alpha$ -L-Fuc-(1,2)- $\beta$ -D-Gal-(1,3)- $\alpha$ -D-GalNAc-O(CH<sub>2</sub>)<sub>6</sub>CH=CH<sub>2</sub>

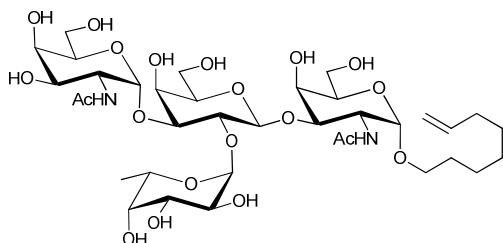

**A type 3 tetrasaccharide (A3)**

MW 842.39 Da

$\alpha$ -D-GalNAc-(1,3)-[ $\alpha$ -L-Fuc-(1,2)]- $\beta$ -D-Gal-(1,3)- $\alpha$ -D-GalNAc-O(CH<sub>2</sub>)<sub>6</sub>CH=CH<sub>2</sub>

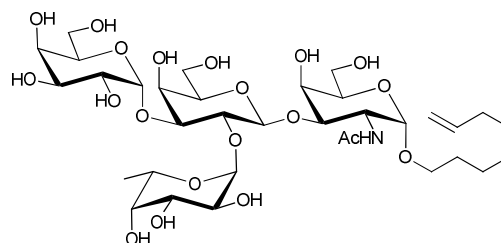

**B type 3 tetrasaccharide (B3)**

MW 801.36 Da

$\alpha$ -D-Gal-(1,3)-[ $\alpha$ -L-Fuc-(1,2)]- $\beta$ -D-Gal-(1,3)- $\alpha$ -D-GalNAc-O(CH<sub>2</sub>)<sub>6</sub>CH=CH<sub>2</sub>

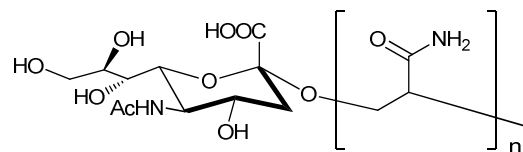

**Neu5Ac-PAA**  
 $\alpha$ -D-Neu5Ac-2-PAA

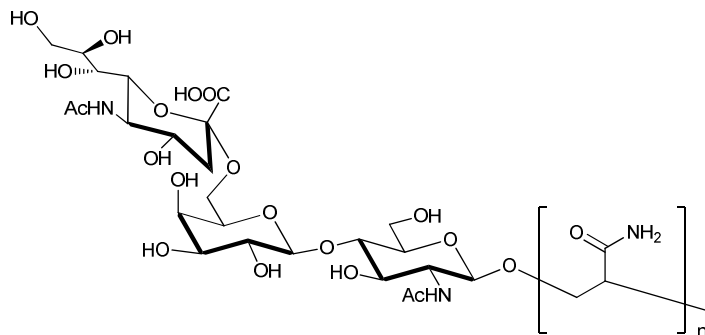

**6'-sialylacNAc-PAA**  
 $\alpha$ -D-Neu5Ac-(2,6)- $\beta$ -D-Gal-(1,4)- $\beta$ -D-GlcNAc-PAA

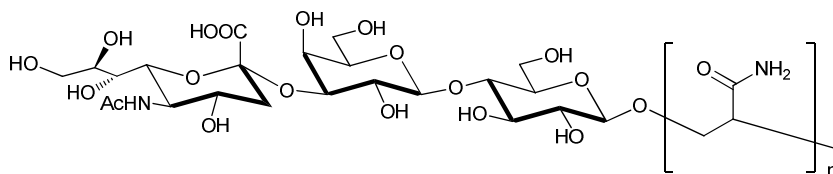

**GM3-PAA**  
 $\alpha$ -D-Neu5Ac-(2,3)- $\beta$ -D-Gal-(1,4)- $\beta$ -D-Glc-PAA

**Figure S1.** Structures of the twenty-component carbohydrate library consisting of the oligosaccharides of gangliosides, globosides and HBGAs and the structures of polyacrylamide (PAA)-conjugated sialic acid-containing oligosaccharides used for the ELISA binding measurements.



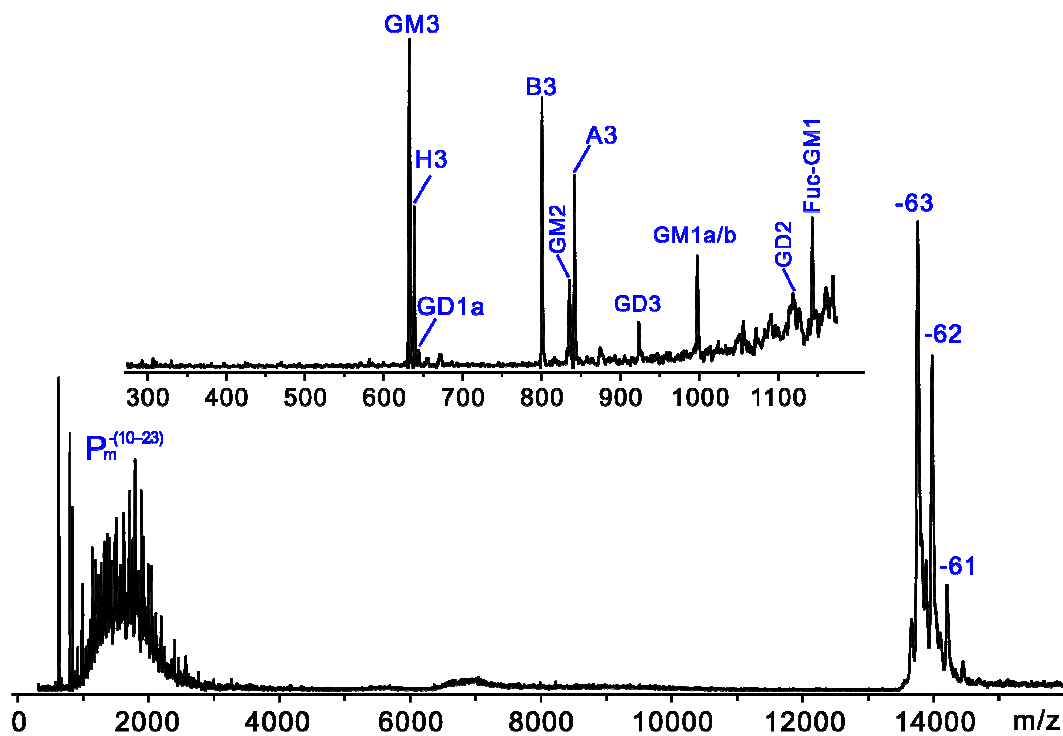

**Figure S2.** CID mass spectrum acquired in negative ion mode for an aqueous ammonium acetate solution (200 mM, pH 7 and 25 °C) of P particle (3  $\mu$ M) and a twenty-component (10  $\mu$ M each) carbohydrate library (GM1a, GM1b, GM2, GM3, GD1a, GD1b, GD2, GD3, GT1a, GT1c, GT2, GT3, Fuc-GM1, asialo-GM1, asialo-GM2, Gb3 and Gb4, as well as the H3, B3 and A3 oligosaccharides) using a broad (200  $m/z$ ) quadrupole isolation window centered at  $m/z$  13,900. A Trap voltage of 200 V was used.

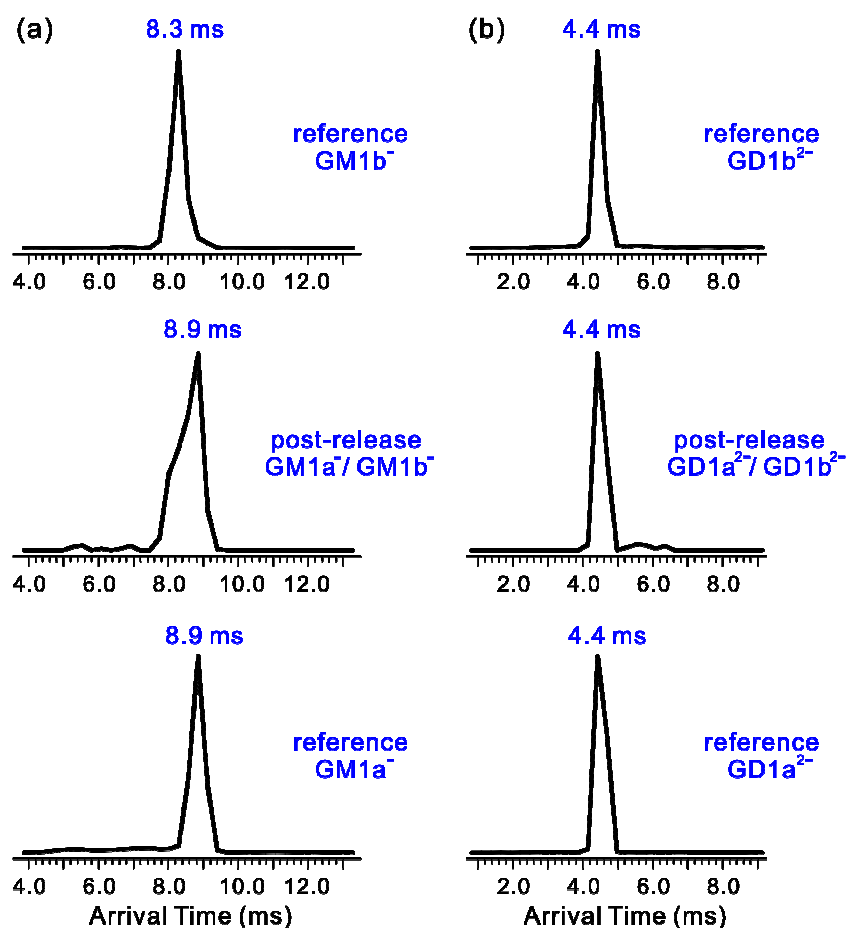

**Figure S3.** (a) Arrival time distributions measured for the (a) deprotonated ions of GM1a/GM1b ( $m/z$  997.3) following release from the P particle (post-release) and the deprotonated GM1a and GM1b ions obtained directly from solution (reference) and (b) double deprotonated GD1a/GD1b ions ( $m/z$  644.1) following release from the P particle (post-release) and the GD1a and GD1b ions obtained directly from solution (reference).

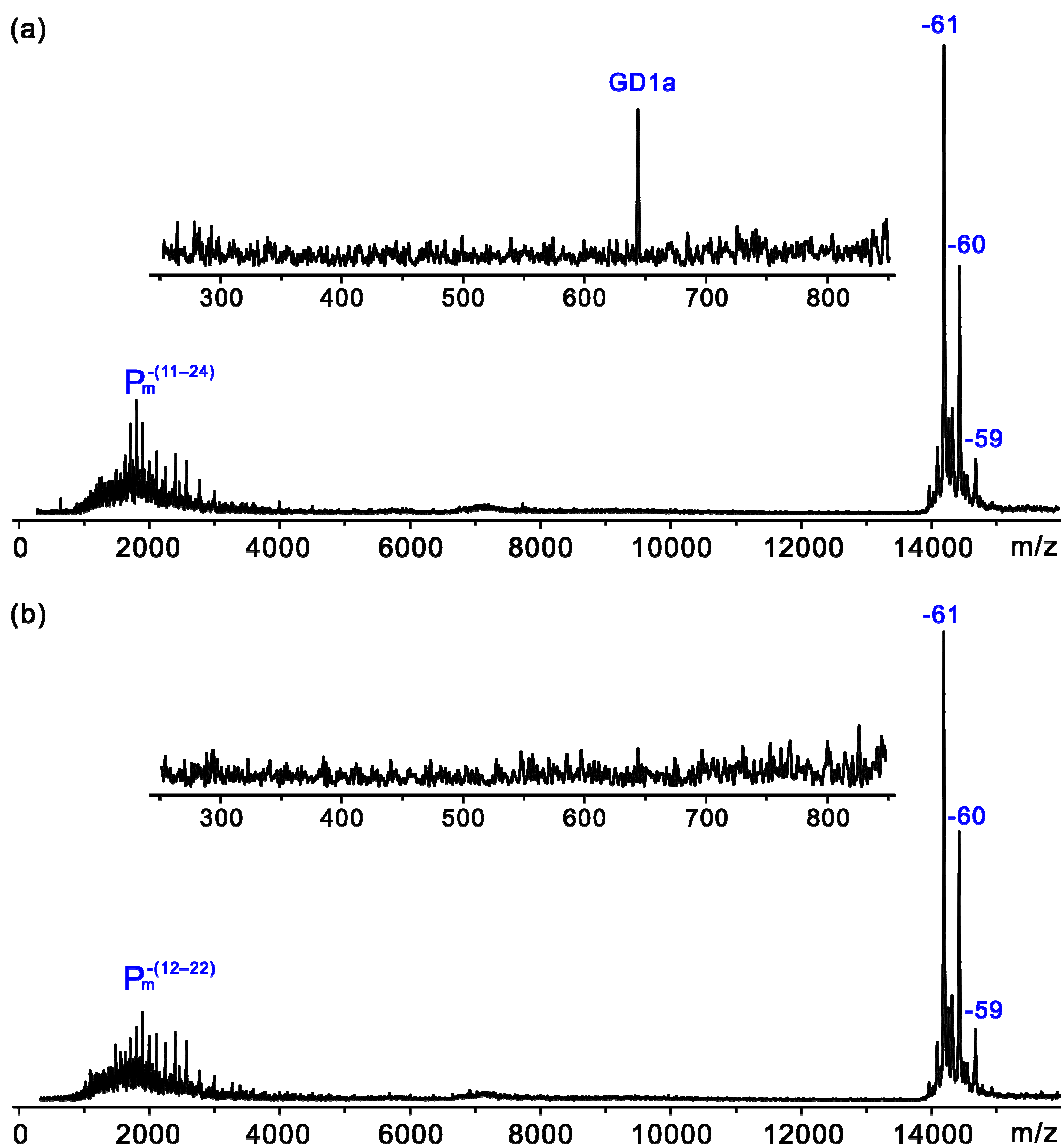

**Figure S4.** CID mass spectra acquired in negative ion mode for an aqueous ammonium acetate solutions (200 mM, pH 7 and 25 °C) of P particle (3  $\mu$ M) and 10  $\mu$ M of (a) GD1a and (b) GD1b using a broad (200  $m/z$ ) quadrupole isolation window centered at  $m/z$  14,350. A Trap voltage of 200 V was used.

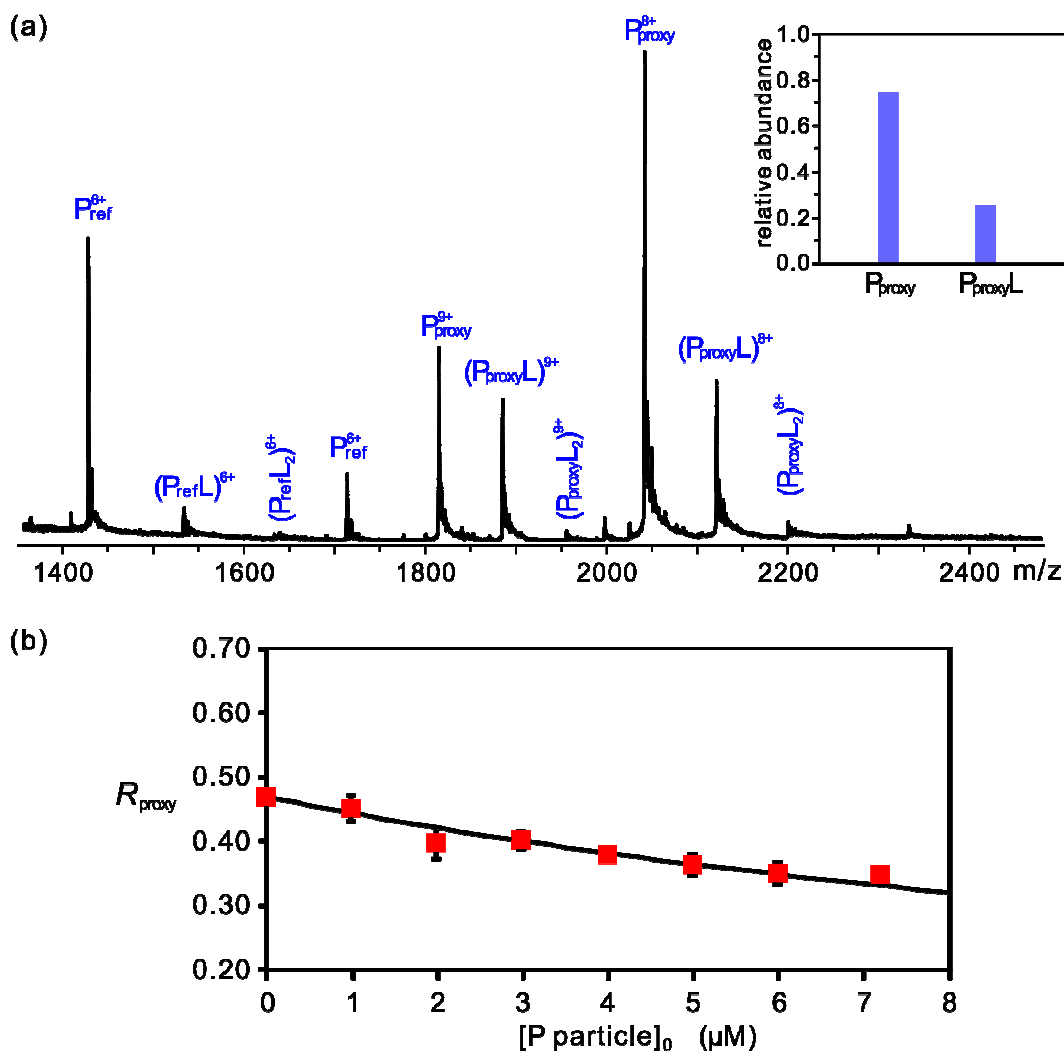

**Figure S5.** (a) Representative ESI mass spectrum measured in positive ion mode for aqueous ammonium acetate solution (160 mM, pH 7 and 25 °C) of  $P_{\text{proxy}}$  (Galectin-3, 3.0 μM),  $P_{\text{ref}}$  (ubiquitin, 1.0 μM), GM3 trisaccharide (40 μM) and NoV P particle (6.0 μM, 24-mer). Inset corresponds to normalized distribution of GM3 bound to  $P_{\text{proxy}}$  after correction for nonspecific ligand binding. (b) Plot of abundance ratio of GM3 trisaccharide-bound  $P_{\text{proxy}}$  to free  $P_{\text{proxy}}$  ( $R_{\text{proxy}}$ ) versus P particle concentration. The solution conditions for each measurement were the same as in (a), but with the addition of P particle. The curve represents the best fit of eq 5 to the experimental data.

## References

- S1. Han, L.; Kitov, P. I.; Kitova, E. N.; Tan, M.; Wang, L.; Xia, M.; Jiang, X.; Klassen, J. S.  
*Glycobiology* **2013**, *23*, 276.
